# Supplementary material for: Deficits in hospital care among clinically vulnerable children aged 0 to 4 years during the COVID-19 pandemic
Source: bioRxiv or medRxiv preprint supplement (doi:10.1101/2021.12.16.21267904), 2021-12-17
Supplement: Supplementary file [file media-1.pdf]

**Supplementary Table 1: Average percentage of 0–4-year-olds with at least one hospital contact per year (2015-19), by risk factors.**

|                               |                        | n (%)            | 2015-19 averages (%)   |         |                    |         |                      |         |
|-------------------------------|------------------------|------------------|------------------------|---------|--------------------|---------|----------------------|---------|
|                               |                        |                  | Outpatient attendances | p-value | Planned admissions | p-value | Unplanned admissions | p-value |
| <b>Clinical vulnerability</b> | No known vulnerability | 2,333,773 (72.2) | 14.1                   | Ref     | 1.74               | Ref     | 8.8                  | Ref     |
|                               | Any vulnerability      | 644,933 (20.0)   | 31.2                   | <0.001  | 10.3               | <0.001  | 18.4                 | <0.001  |
|                               | • LBW/Preterm only     | 238,559 (7.4)    | 17.8                   | <0.001  | 1.65               | 0.012   | 8.4                  | <0.001  |
|                               | • CC only              | 329,072 (10.2)   | 39.1                   | <0.001  | 16.0               | <0.001  | 25.3                 | <0.001  |
|                               | • Both                 | 77,302 (2.4)     | 38.8                   | <0.001  | 12.3               | <0.001  | 20.0                 | <0.001  |
|                               | Any CC <sup>α</sup>    | 406,374 (12.6)   | 38.9                   | <0.001  | 15.3               | <0.001  | 24.3                 | <0.001  |
| <b>Age group</b>              | Infants (<1 year old)  | 628,900 (19.5)   | 60.1                   | <0.001  | 4.2                | <0.001  | 26.4                 | <0.001  |
|                               | 1–4-year-olds          | 2,601,649 (80.5) | 8.2                    | Ref     | 3.5                | Ref     | 8.0                  | Ref     |
| <b>Ethnic group</b>           | White                  | 2,296,986 (71.1) | 17.7                   | Ref     | 3.7                | Ref     | 12.0                 | Ref     |
|                               | Black                  | 153,009 (4.7)    | 15.8                   | <0.001  | 3.8                | 0.018   | 9.2                  | <0.001  |
|                               | Asian                  | 345,843 (10.7)   | 18.0                   | <0.001  | 3.6                | 0.007   | 11.6                 | <0.001  |
|                               | Other                  | 257,651 (8.0)    | 19.1                   | <0.001  | 3.6                | 0.006   | 10.7                 | <0.001  |
| <b>Deprivation quintile</b>   | Q1 (most deprived)     | 755,351 (23.4)   | 19.5                   | <0.001  | 4.4                | 0.304   | 14.0                 | <0.001  |
|                               | Q2                     | 607,815 (18.8)   | 19.6                   | <0.001  | 4.2                | 0.003   | 13.3                 | <0.001  |
|                               | Q3                     | 502,672 (15.6)   | 20.2                   | <0.001  | 4.2                | <0.001  | 13.5                 | 0.071   |
|                               | Q4                     | 430,486 (13.3)   | 21.2                   | <0.001  | 4.3                | 0.086   | 13.8                 | 0.12    |
|                               | Q5 (least deprived)    | 404,753 (12.5)   | 22.5                   | Ref     | 4.3                | Ref     | 13.6                 | Ref     |

**LBW** – Low birthweight; **CC** – Chronic conditions. \* N = 3,230,549 (Average eligible population between 2015-2019). Ref – Reference group. P-values: Chi-square test for comparison with reference group. <sup>α</sup> Children with any chronic condition (combines CC only and Both).

**Supplementary Table 2: Difference in predicted and observed rates of hospital contact during the pandemic (March 2020-2021) among children aged 0 to 4 years, by age.**

|                               | Percentage of children seen |           |      | Number of hospital contacts |           |            |          | Rates per 1000 child-years |          |                           |          |
|-------------------------------|-----------------------------|-----------|------|-----------------------------|-----------|------------|----------|----------------------------|----------|---------------------------|----------|
|                               | n                           | N         | %    | Predicted                   | Observed  | Difference | % change | Predicted                  | Observed | Difference (95% CI)       | % change |
| <b>Outpatient attendances</b> |                             |           |      |                             |           |            |          |                            |          |                           |          |
| <b>Total</b>                  | 426,871                     | 3,034,197 | 14.1 | 1,687,100                   | 1,282,399 | -404,701   | -24.0    | 556                        | 423      | <b>-133</b> (-131, -136)  | -24.0    |
| Infants (<1 year old)         | 313,236                     | 568,812   | 55.1 | 900993                      | 815513    | -85,480    | -9.5     | 1584                       | 1434     | <b>-150*</b> (-143, -157) | -9.5     |
| 1–4-year-olds                 | 113,635                     | 2,465,385 | 4.6  | 786107                      | 466886    | -319,221   | -40.6    | 319                        | 189      | <b>-129</b> (-128, -131)  | -40.6    |
| <b>Planned admissions</b>     |                             |           |      |                             |           |            |          |                            |          |                           |          |
| <b>Total</b>                  | 63,439                      | 3,034,197 | 2.1  | 166,954                     | 104,464   | -62,490    | -37.4    | 55                         | 34       | <b>-21</b> (-20, -21)     | -37.4    |
| Infants (<1 year old)         | 19,597                      | 568,812   | 3.4  | 35045                       | 28108     | -6,937     | -19.8    | 62                         | 49       | <b>-12*</b> (-11, -14)    | -19.8    |
| 1–4-year-olds                 | 43,842                      | 2,465,385 | 1.8  | 131909                      | 76356     | -55,553    | -42.1    | 54                         | 31       | <b>-23</b> (-22, -23)     | -42.1    |
| <b>Unplanned admissions</b>   |                             |           |      |                             |           |            |          |                            |          |                           |          |
| <b>Total</b>                  | 208,377                     | 3,034,197 | 6.9  | 519,640                     | 268,220   | -251,420   | -48.4    | 171                        | 88       | <b>-83</b> (-81, -84)     | -48.4    |
| Infants (<1 year old)         | 106,048                     | 568,812   | 18.6 | 226396                      | 137884    | -88,512    | -39.1    | 398                        | 242      | <b>-156*</b> (-152, -159) | -39.1    |
| 1–4-year-olds                 | 102,329                     | 2,465,385 | 4.2  | 293244                      | 130336    | -162,908   | -55.6    | 119                        | 53       | <b>-66</b> (-65, -67)     | -55.6    |

\* Significantly different from 1–4-year-olds (5% level of significance).

**Supplementary Table 3: Difference in predicted and observed rates of hospital contact during the pandemic (March 2020-2021) among children aged 0 to 4 years, by ethnic group.**

|                               | Percentage of children seen |           |      | Number of hospital contacts |           |            |          | Rates per 1000 child-years |          |                          |          |
|-------------------------------|-----------------------------|-----------|------|-----------------------------|-----------|------------|----------|----------------------------|----------|--------------------------|----------|
|                               | n                           | N         | %    | Predicted                   | Observed  | Difference | % change | Predicted                  | Observed | Difference (95% CI)      | % change |
| <b>Outpatient attendances</b> |                             |           |      |                             |           |            |          |                            |          |                          |          |
| <b>Total</b>                  | 380,925                     | 2,872,476 | 13.3 | 1,589,161                   | 1,203,043 | -386,118   | -24.3    | 553                        | 419      | <b>-134</b> (-131, -138) | -24.3    |
| White                         | 277,757                     | 2,125,238 | 13.1 | 1177279                     | 889991    | -287,288   | -24.4    | 554                        | 419      | <b>-135</b> (-133, -137) | -24.4    |
| Black                         | 17,582                      | 140,621   | 12.5 | 70897                       | 52346     | -18,551    | -26.2    | 504                        | 372      | <b>-132</b> (-124, -140) | -26.2    |
| Asian                         | 48,025                      | 338,198   | 14.2 | 195379                      | 150173    | -45,206    | -23.1    | 578                        | 444      | <b>-134</b> (-128, -139) | -23.1    |
| Other                         | 37,561                      | 268,419   | 14.0 | 145606                      | 110533    | -35,073    | -24.1    | 542                        | 412      | <b>-131</b> (-125, -137) | -24.1    |
| <b>Planned admissions</b>     |                             |           |      |                             |           |            |          |                            |          |                          |          |
| <b>Total</b>                  | 60,815                      | 2,872,476 | 2.1  | 161,107                     | 102,311   | -58,796    | -36.5    | 56                         | 36       | <b>-20</b> (-19, -22)    | -36.5    |
| White                         | 45,439                      | 2,125,238 | 2.1  | 116675                      | 75721     | -40,954    | -35.1    | 55                         | 36       | <b>-19</b> (-19, -20)    | -35.1    |
| Black                         | 3,053                       | 140,621   | 2.2  | 8443                        | 4798      | -3,645     | -43.2    | 60                         | 34       | <b>-26*</b> (-23, -29)   | -43.2    |
| Asian                         | 6,790                       | 338,198   | 2.0  | 20335                       | 12319     | -8,016     | -39.4    | 60                         | 36       | <b>-24*</b> (-22, -26)   | -39.4    |
| Other                         | 5,533                       | 268,419   | 2.1  | 15654                       | 9473      | -6,181     | -39.5    | 58                         | 35       | <b>-23*</b> (-21, -25)   | -39.5    |
| <b>Unplanned admissions</b>   |                             |           |      |                             |           |            |          |                            |          |                          |          |
| <b>Total</b>                  | 199,183                     | 2,872,476 | 6.9  | 498,620                     | 260,250   | -238,370   | -47.8    | 174                        | 91       | <b>-83</b> (-81, -85)    | -47.8    |
| White                         | 152,225                     | 2,125,238 | 7.2  | 378452                      | 199614    | -178,838   | -47.3    | 178                        | 94       | <b>-84</b> (-83, -85)    | -47.3    |
| Black                         | 7,566                       | 140,621   | 5.4  | 18489                       | 9442      | -9,047     | -48.9    | 131                        | 67       | <b>-64*</b> (-60, -69)   | -48.9    |
| Asian                         | 22,516                      | 338,198   | 6.7  | 61164                       | 29575     | -31,589    | -51.6    | 181                        | 87       | <b>-93*</b> (-90, -97)   | -51.6    |
| Other                         | 16,876                      | 268,419   | 6.3  | 40515                       | 21619     | -18,896    | -46.6    | 151                        | 81       | <b>-70*</b> (-67, -74)   | -46.6    |

\* Significantly different from children in the white ethnic group (5% level of significance). Other ethnic group includes Chinese and mixed ethnicity.

**Supplementary Table 4: Difference in predicted and observed rates of hospital contact during the pandemic (March 2020-2021) among children aged 0 to 4 years, by deprivation quintile.**

|                               | Percentage of children seen |           |      | Number of hospital contacts |           |            |          | Rates per 1000 child-years |          |                         |          |
|-------------------------------|-----------------------------|-----------|------|-----------------------------|-----------|------------|----------|----------------------------|----------|-------------------------|----------|
|                               | n                           | N         | %    | Predicted                   | Observed  | Difference | % change | Predicted                  | Observed | Difference (95% CI)     | % change |
| <b>Outpatient attendances</b> |                             |           |      |                             |           |            |          |                            |          |                         |          |
| <b>Total</b>                  | 389,098                     | 2,733,692 | 14.2 | 1,433,837                   | 1,213,380 | -220,457   | -15.4    | 525                        | 444      | <b>-81</b> (-78, -86)   | -15.4    |
| Q1                            | 103,866                     | 750,360   | 13.8 | 405740                      | 331783    | -73,957    | -18.2    | 541                        | 442      | <b>-99*</b> (-95, -102) | -18.2    |
| Q2                            | 84,205                      | 604,305   | 13.9 | 304926                      | 257812    | -47,114    | -15.5    | 505                        | 427      | <b>-78</b> (-74, -82)   | -15.5    |
| Q3                            | 72,458                      | 512,075   | 14.1 | 260352                      | 226099    | -34,253    | -13.2    | 508                        | 442      | <b>-67*</b> (-63, -71)  | -13.2    |
| Q4                            | 65,403                      | 447,272   | 14.6 | 234302                      | 202578    | -31,724    | -13.5    | 524                        | 453      | <b>-71</b> (-67, -75)   | -13.5    |
| Q5 (least deprived)           | 63,166                      | 419,680   | 15.1 | 228517                      | 195108    | -33,409    | -14.6    | 545                        | 465      | <b>-80</b> (-75, -84)   | -14.6    |
| <b>Planned admissions</b>     |                             |           |      |                             |           |            |          |                            |          |                         |          |
| <b>Total</b>                  | 62,744                      | 2,733,692 | 2.3  | 146,454                     | 104,255   | -42,199    | -28.8    | 54                         | 38       | <b>-16</b> (-14, -17)   | -28.8    |
| Q1                            | 17,518                      | 750,360   | 2.3  | 42046                       | 28414     | -13,632    | -32.4    | 56                         | 38       | <b>-18*</b> (-17, -19)  | -32.4    |
| Q2                            | 13,703                      | 604,305   | 2.3  | 32566                       | 22934     | -9,632     | -29.6    | 54                         | 38       | <b>-16*</b> (-15, -17)  | -29.6    |
| Q3                            | 11,625                      | 512,075   | 2.3  | 26400                       | 19069     | -7,331     | -27.8    | 52                         | 37       | <b>-14</b> (-13, -16)   | -27.8    |
| Q4                            | 10,163                      | 447,272   | 2.3  | 23504                       | 17253     | -6,251     | -26.6    | 53                         | 39       | <b>-14</b> (-13, -15)   | -26.6    |
| Q5 (least deprived)           | 9,735                       | 419,680   | 2.3  | 21938                       | 16585     | -5,353     | -24.4    | 52                         | 40       | <b>-13</b> (-11, -14)   | -24.4    |
| <b>Unplanned admissions</b>   |                             |           |      |                             |           |            |          |                            |          |                         |          |
| <b>Total</b>                  | 206,549                     | 2,733,692 | 7.6  | 459,218                     | 267,418   | -191,800   | -41.8    | 168                        | 98       | <b>-70</b> (-68, -73)   | -41.8    |
| Q1                            | 57,328                      | 750,360   | 7.6  | 133406                      | 74919     | -58,487    | -43.8    | 178                        | 100      | <b>-78*</b> (-76, -80)  | -43.8    |
| Q2                            | 44,184                      | 604,305   | 7.3  | 98003                       | 57071     | -40,932    | -41.8    | 162                        | 94       | <b>-68</b> (-66, -70)   | -41.8    |
| Q3                            | 38,374                      | 512,075   | 7.5  | 84028                       | 49672     | -34,356    | -40.9    | 164                        | 97       | <b>-67</b> (-65, -69)   | -40.9    |
| Q4                            | 34,434                      | 447,272   | 7.7  | 74938                       | 44550     | -30,388    | -40.6    | 168                        | 100      | <b>-68</b> (-65, -71)   | -40.6    |
| Q5 (least deprived)           | 32,229                      | 419,680   | 7.7  | 68843                       | 41206     | -27,637    | -40.1    | 164                        | 98       | <b>-66</b> (-63, -68)   | -40.1    |

\* Significantly different from children in the least deprived quintile (5% level of significance).

**Supplementary Table 5: Difference in predicted and observed rates of hospital contact per 1,000 child-years among children aged 0 to 4 years during the pandemic (March 2020-2021), by period and age.**

|                               | March 23 to June 23, 2020 |          | June 24 to Nov 4, 2020    |          | Nov 5 to Dec 31, 2020     |          | Jan 1 to March 22, 2021   |          |
|-------------------------------|---------------------------|----------|---------------------------|----------|---------------------------|----------|---------------------------|----------|
|                               | Deficit (95% CI)          | % change | Deficit (95% CI)          | % change | Deficit (95% CI)          | % change | Deficit (95% CI)          | % change |
| <b>Outpatient attendances</b> |                           |          |                           |          |                           |          |                           |          |
| <b>Total</b>                  | <b>-170</b> (-167, -172)  | -30.7    | <b>-90</b> (-88, -92)     | -16.6    | <b>-101</b> (-98, -104)   | -18.8    | <b>-184</b> (-181, -188)  | -30.7    |
| Infants (<1 year old)         | <b>-310*</b> (-304, -317) | -20.2    | <b>-37*</b> (-32, -43)    | -2.4     | <b>-70*</b> (-62, -79)    | -4.5     | <b>-207*</b> (-198, -217) | -12.3    |
| 1–4-year-olds                 | <b>-137</b> (-136, -139)  | -43.9    | <b>-102</b> (-101, -103)  | -32.9    | <b>-108</b> (-106, -110)  | -36.0    | <b>-179</b> (-177, -181)  | -51.3    |
| <b>Planned admissions</b>     |                           |          |                           |          |                           |          |                           |          |
| <b>Total</b>                  | <b>-33</b> (-32, -33)     | -60.1    | <b>-16</b> (-15, -17)     | -29.1    | <b>-9</b> (-8, -10)       | -17.6    | <b>-22</b> (-21, -23)     | -38.2    |
| Infants (<1 year old)         | <b>-25*</b> (-23, -26)    | -40.8    | <b>-8*</b> (-7, -9)       | -13.1    | <b>-2*</b> (0, -4)        | -3.3     | <b>-12*</b> (-10, -14)    | -18.3    |
| 1–4-year-olds                 | <b>-35</b> (-34, -35)     | -65.2    | <b>-18</b> (-17, -18)     | -33.4    | <b>-10</b> (-10, -11)     | -21.6    | <b>-24</b> (-24, -25)     | -43.4    |
| <b>Unplanned admissions</b>   |                           |          |                           |          |                           |          |                           |          |
| <b>Total</b>                  | <b>-82</b> (-81, -83)     | -53.2    | <b>-60</b> (-59, -61)     | -38.2    | <b>-124</b> (-122, -126)  | -55.5    | <b>-92</b> (-91, -94)     | -52.1    |
| Infants (<1 year old)         | <b>-150*</b> (-147, -153) | -41.4    | <b>-103*</b> (-100, -106) | -28.6    | <b>-288*</b> (-283, -293) | -53.4    | <b>-154*</b> (-149, -159) | -38.7    |
| 1–4-year-olds                 | <b>-66</b> (-65, -67)     | -62.6    | <b>-50</b> (-49, -50)     | -45.4    | <b>-86</b> (-85, -87)     | -57.2    | <b>-78</b> (-77, -80)     | -61.8    |

\* Significantly different from 1–4-year-olds (5% level of significance).

**Supplementary Table 6: Difference in predicted and observed rates of hospital contact per 1,000 child-years among children aged 0 to 4 years during the pandemic (March 2020-2021), by period and ethnic group.**

|                               | March 23 to June 23, 2020 |          | June 24 to Nov 4, 2020  |          | Nov 5 to Dec 31, 2020     |          | Jan 1 to March 22, 2021   |          |
|-------------------------------|---------------------------|----------|-------------------------|----------|---------------------------|----------|---------------------------|----------|
|                               | Deficit (95% CI)          | % change | Deficit (95% CI)        | % change | Deficit (95% CI)          | % change | Deficit (95% CI)          | % change |
| <b>Outpatient attendances</b> |                           |          |                         |          |                           |          |                           |          |
| <b>Total</b>                  | <b>-178</b> (-175, -181)  | -34.1    | <b>-99</b> (-97, -102)  | -18.1    | <b>-111</b> (-107, -115)  | -20.5    | <b>-157</b> (-153, -161)  | -27.7    |
| White                         | <b>-179</b> (-177, -181)  | -32.3    | <b>-99</b> (-97, -101)  | -18.0    | <b>-118</b> (-116, -121)  | -21.7    | <b>-155</b> (-153, -158)  | -27.6    |
| Black                         | <b>-178</b> (-170, -185)  | -36.1    | <b>-101</b> (-94, -107) | -20.1    | <b>-67*</b> (-58, -76)    | -14.1    | <b>-175*</b> (-164, -186) | -32.5    |
| Asian                         | <b>-179</b> (-174, -185)  | -31.5    | <b>-103</b> (-98, -107) | -17.9    | <b>-87*</b> (-80, -93)    | -15.8    | <b>-163</b> (-156, -171)  | -26.9    |
| Other                         | <b>-176</b> (-170, -181)  | -32.8    | <b>-98</b> (-93, -102)  | -18.1    | <b>-105*</b> (-98, -112)  | -19.9    | <b>-150</b> (-142, -158)  | -26.8    |
| <b>Planned admissions</b>     |                           |          |                         |          |                           |          |                           |          |
| <b>Total</b>                  | <b>-34</b> (-33, -35)     | -60.1    | <b>-17</b> (-16, -18)   | -29.4    | <b>-9</b> (-8, -10)       | -17.7    | <b>-19</b> (-17, -20)     | -33.5    |
| White                         | <b>-33</b> (-32, -33)     | -59.2    | <b>-16</b> (-15, -16)   | -27.8    | <b>-9</b> (-8, -10)       | -17.3    | <b>-17</b> (-16, -18)     | -31.4    |
| Black                         | <b>-37*</b> (-34, -39)    | -62.4    | <b>-24*</b> (-22, -27)  | -38.6    | <b>-11</b> (-8, -15)      | -20.7    | <b>-26*</b> (-23, -30)    | -44.0    |
| Asian                         | <b>-38*</b> (-36, -39)    | -61.7    | <b>-20*</b> (-19, -22)  | -33.5    | <b>-10</b> (-8, -12)      | -17.4    | <b>-23*</b> (-21, -25)    | -37.8    |
| Other                         | <b>-39*</b> (-37, -41)    | -63.8    | <b>-18*</b> (-17, -20)  | -30.7    | <b>-10</b> (-8, -12)      | -18.9    | <b>-22*</b> (-19, -25)    | -38.1    |
| <b>Unplanned admissions</b>   |                           |          |                         |          |                           |          |                           |          |
| <b>Total</b>                  | <b>-85</b> (-83, -87)     | -53.6    | <b>-62</b> (-61, -63)   | -38.4    | <b>-128</b> (-125, -130)  | -55.6    | <b>-83</b> (-81, -85)     | -48.9    |
| White                         | <b>-84</b> (-83, -85)     | -51.5    | <b>-63</b> (-62, -64)   | -38.2    | <b>-135</b> (-134, -137)  | -56.8    | <b>-82</b> (-81, -84)     | -47.6    |
| Black                         | <b>-74*</b> (-70, -78)    | -59.9    | <b>-48*</b> (-45, -51)  | -37.9    | <b>-85*</b> (-80, -91)    | -51.9    | <b>-65*</b> (-60, -71)    | -52.1    |
| Asian                         | <b>-104*</b> (-101, -107) | -62.8    | <b>-67*</b> (-65, -70)  | -40.4    | <b>-122*</b> (-118, -127) | -52.8    | <b>-102*</b> (-98, -107)  | -55.9    |
| Other                         | <b>-77*</b> (-74, -80)    | -55.5    | <b>-54*</b> (-51, -56)  | -37.7    | <b>-95*</b> (-90, -99)    | -49.5    | <b>-72*</b> (-68, -76)    | -48.7    |

\* Significantly different from children in the white ethnic group (5% level of significance).

**Supplementary Table 7: Difference in predicted and observed rates of hospital contact per 1,000 child-years among children aged 0 to 4 years during the pandemic (March 2020-2021), by period and deprivation quintile.**

|                               | March 23 to June 23, 2020 |          | June 24 to Nov 4, 2020 |          | Nov 5 to Dec 31, 2020    |          | Jan 1 to March 22, 2021 |          |
|-------------------------------|---------------------------|----------|------------------------|----------|--------------------------|----------|-------------------------|----------|
|                               | Deficit (95% CI)          | % change | Deficit (95% CI)       | % change | Deficit (95% CI)         | % change | Deficit (95% CI)        | % change |
| <b>Outpatient attendances</b> |                           |          |                        |          |                          |          |                         |          |
| <b>Total</b>                  | <b>-134</b> (-131, -138)  | -25.4    | <b>-51</b> (-48, -54)  | -9.6     | <b>-64</b> (-60, -69)    | -12.4    | <b>-80</b> (-75, -85)   | -15.5    |
| Q1                            | <b>-151*</b> (-148, -155) | -28.0    | <b>-75*</b> (-72, -77) | -13.7    | <b>-74*</b> (-70, -78)   | -13.9    | <b>-93</b> (-89, -98)   | -17.6    |
| Q2                            | <b>-126</b> (-123, -130)  | -25.1    | <b>-50</b> (-47, -53)  | -9.9     | <b>-64</b> (-60, -69)    | -12.9    | <b>-77*</b> (-72, -81)  | -15.5    |
| Q3                            | <b>-126</b> (-122, -129)  | -24.4    | <b>-34*</b> (-31, -37) | -6.7     | <b>-49*</b> (-44, -54)   | -9.7     | <b>-65*</b> (-60, -70)  | -13.1    |
| Q4                            | <b>-127</b> (-123, -131)  | -23.8    | <b>-35*</b> (-32, -39) | -6.7     | <b>-65</b> (-60, -70)    | -12.5    | <b>-69*</b> (-64, -74)  | -13.6    |
| Q5 (least deprived)           | <b>-131</b> (-127, -136)  | -23.9    | <b>-45</b> (-42, -49)  | -8.3     | <b>-63</b> (-58, -69)    | -11.9    | <b>-87</b> (-82, -93)   | -16.3    |
| <b>Planned admissions</b>     |                           |          |                        |          |                          |          |                         |          |
| <b>Total</b>                  | <b>-31</b> (-30, -32)     | -56.0    | <b>-12</b> (-11, -13)  | -21.8    | <b>-5</b> (-3, -6)       | -9.2     | <b>-11</b> (-10, -13)   | -21.8    |
| Q1                            | <b>-33*</b> (-32, -35)    | -58.2    | <b>-14*</b> (-13, -15) | -24.8    | <b>-7*</b> (-6, -9)      | -14.0    | <b>-15*</b> (-13, -16)  | -26.9    |
| Q2                            | <b>-31*</b> (-30, -32)    | -56.5    | <b>-13*</b> (-12, -14) | -22.8    | <b>-4</b> (-2, -5)       | -7.6     | <b>-12*</b> (-11, -14)  | -23.7    |
| Q3                            | <b>-29</b> (-27, -30)     | -55.1    | <b>-12</b> (-11, -13)  | -22.3    | <b>-4</b> (-3, -6)       | -8.6     | <b>-8</b> (-7, -10)     | -17.7    |
| Q4                            | <b>-30</b> (-28, -31)     | -55.1    | <b>-10</b> (-9, -11)   | -17.8    | <b>-3</b> (-1, -4)       | -5.6     | <b>-11*</b> (-9, -12)   | -21.7    |
| Q5 (least deprived)           | <b>-28</b> (-27, -29)     | -53.0    | <b>-10</b> (-9, -11)   | -18.2    | <b>-3</b> (-2, -5)       | -6.7     | <b>-6</b> (-5, -8)      | -13.3    |
| <b>Unplanned admissions</b>   |                           |          |                        |          |                          |          |                         |          |
| <b>Total</b>                  | <b>-76</b> (-74, -78)     | -48.8    | <b>-51</b> (-49, -53)  | -32.3    | <b>-116</b> (-113, -119) | -51.3    | <b>-62</b> (-60, -65)   | -39.9    |
| Q1                            | <b>-88*</b> (-86, -90)    | -52.7    | <b>-56*</b> (-55, -58) | -33.9    | <b>-122*</b> (-119, 125) | -51.9    | <b>-70*</b> (-68, -73)  | -42.0    |
| Q2                            | <b>-77*</b> (-75, -79)    | -50.2    | <b>-48</b> (-46, -49)  | -31.7    | <b>-110</b> (-107, -113) | -50.3    | <b>-60</b> (-57, -62)   | -40.0    |
| Q3                            | <b>-71</b> (-69, -73)     | -47.2    | <b>-47</b> (-45, -49)  | -30.5    | <b>-116</b> (-112, -119) | -51.9    | <b>-61</b> (-58, -64)   | -39.8    |
| Q4                            | <b>-69</b> (-67, -71)     | -45.2    | <b>-51</b> (-49, -53)  | -32.2    | <b>-118</b> (-114, -121) | -51.8    | <b>-59</b> (-56, -62)   | -37.9    |
| Q5 (least deprived)           | <b>-67</b> (-65, -69)     | -45.0    | <b>-51</b> (-49, -53)  | -32.4    | <b>-110</b> (-107, -114) | -50.1    | <b>-57</b> (-54, -60)   | -37.9    |

\* Significantly different from children in the least deprived quintile (5% level of significance).

**Supplementary table 8: Type of outpatient attendance before and during the pandemic**

| Outpatient attendance type | Pre-pandemic (Jan 1, 2015- Mar 22, 2020) |      | During the pandemic (Mar 23, 2020- Mar 31, 2021) |      |
|----------------------------|------------------------------------------|------|--------------------------------------------------|------|
|                            | n                                        | %    | n                                                | %    |
| Attended in-person         | 12,470,629                               | 96.8 | 1,730,141                                        | 75.2 |
| Attended tele/virtual      | 411,112                                  | 3.2  | 570,405                                          | 24.8 |
| Total                      | 12,261,444                               | 100  | 2,300,546                                        | 100  |



**Supplementary Figure 1: Study population showing ascertainment of vulnerability status (exposure) from birth and hospital contacts (outcomes) from January 1, 2015 to March 31, 2021 for children aged 0 to 4 completed years. \***

| Year of birth | Outcome year |      |      |      |      |      |      |      |      |      |      |      |
|---------------|--------------|------|------|------|------|------|------|------|------|------|------|------|
|               | 2010         | 2011 | 2012 | 2013 | 2014 | 2015 | 2016 | 2017 | 2018 | 2019 | 2020 | 2021 |
| 2010          | <1           | 1    | 2    | 3    | 4    | 5    | 6    | 7    | 8    | 9    | 10   | 11   |
| 2011          |              | <1   | 1    | 2    | 3    | 4    | 5    | 6    | 7    | 8    | 9    | 10   |
| 2012          |              |      | <1   | 1    | 2    | 3    | 4    | 5    | 6    | 7    | 8    | 9    |
| 2013          |              |      |      | <1   | 1    | 2    | 3    | 4    | 5    | 6    | 7    | 8    |
| 2014          |              |      |      |      | <1   | 1    | 2    | 3    | 4    | 5    | 6    | 7    |
| 2015          |              |      |      |      |      | <1   | 1    | 2    | 3    | 4    | 5    | 6    |
| 2016          |              |      |      |      |      |      | <1   | 1    | 2    | 3    | 4    | 5    |
| 2017          |              |      |      |      |      |      |      | <1   | 1    | 2    | 3    | 4    |
| 2018          |              |      |      |      |      |      |      |      | <1   | 1    | 2    | 3    |
| 2019          |              |      |      |      |      |      |      |      |      | <1   | 1    | 2    |
| 2020          |              |      |      |      |      |      |      |      |      |      | <1   | 1    |
| 2021          |              |      |      |      |      |      |      |      |      |      |      | <1   |

**Exposure**

 Low birth weight and preterm births  
 Chronic conditions

 2 Age

**Outcomes**

 Not considered  
 Partially considered  
 Fully considered  
 Not yet born

\*Partially considered: For example, a child born on 1st June 2010 would turn 5 on 1st June 2015 and would therefore contribute data for part of 2015.

**Supplementary Figure 2: Pre-pandemic average rate of hospital contacts per 1,000 child-years among children aged 0 to 4 years (2015 to 2019), by clinical vulnerability status and risk factors.**

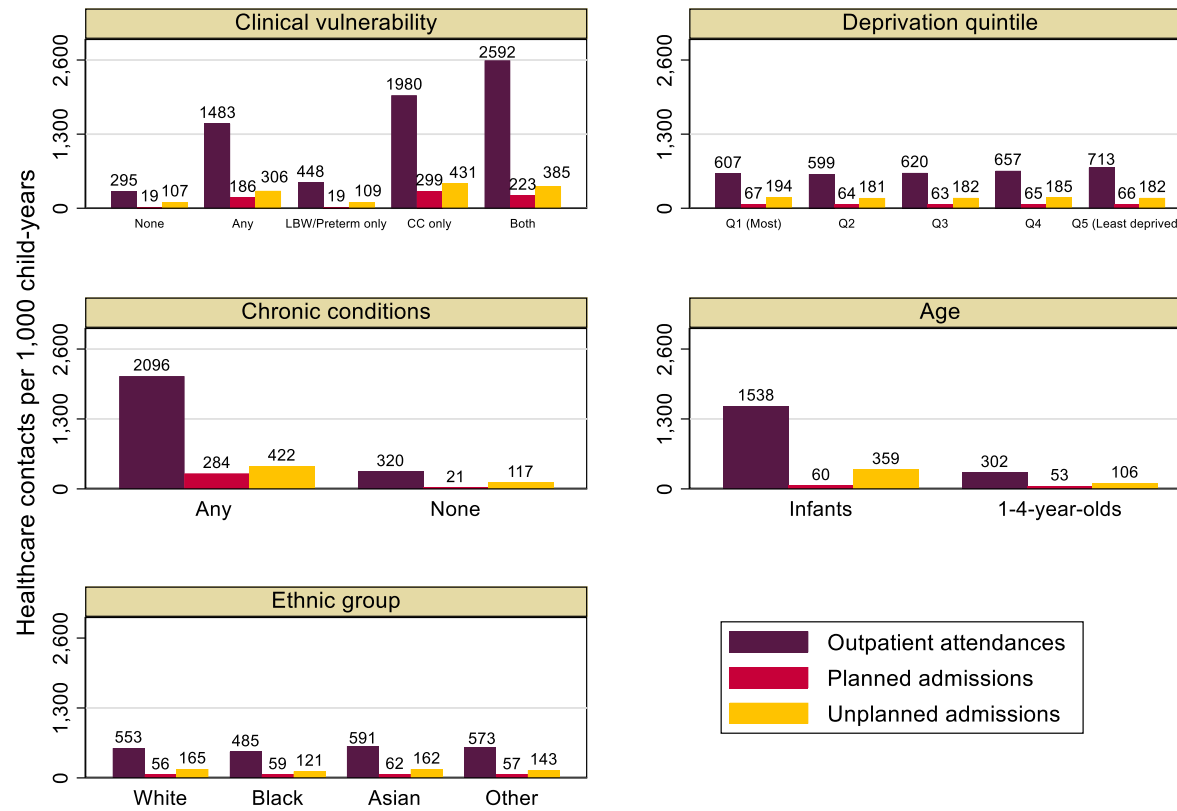

**LBW** – Low birthweight; **CC** – Chronic conditions

**Supplementary Figure 3: Pre-pandemic average rate of hospital contacts per 1,000 child-years among children aged 0 to 4 years (2015 to 2019), by ethnic group and presence of a chronic condition.**

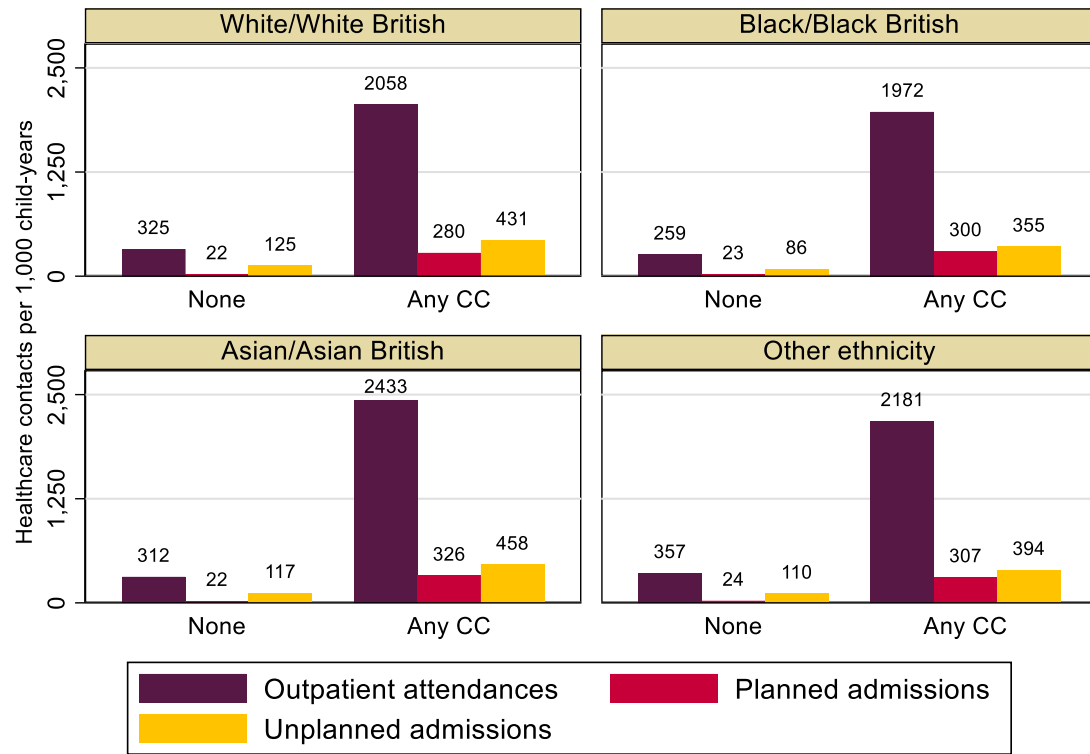

**CC** – Chronic conditions

**Supplementary Figure 4: Pre-pandemic average rate of hospital contacts per 1,000 child-years among children aged 0 to 4 years (2015 to 2019), by deprivation quintile and presence of a chronic condition.**

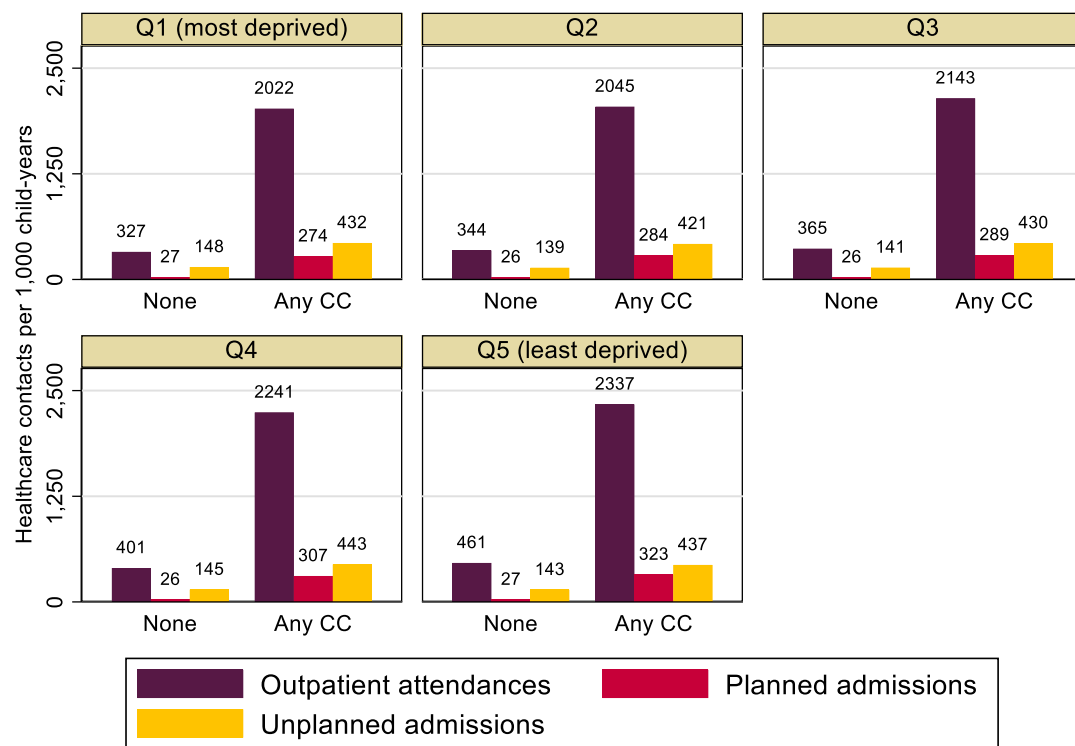

CC – Chronic conditions

**Supplementary Figure 5: Deficit in care during the pandemic (March 2020-2021), estimated from predicted minus observed rates of hospital contacts per 1,000 child-years for children aged 0 to 4 years, by ethnic group and presence of a chronic condition.**

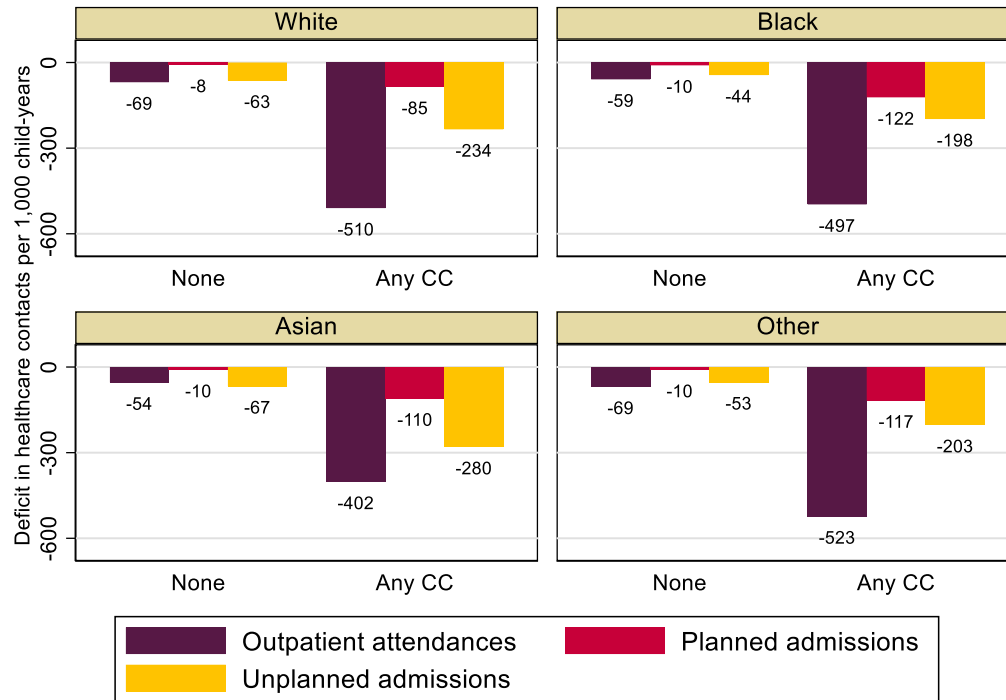

**CC** – Chronic conditions

**Supplementary Figure 6: Deficit in care during the pandemic (March 2020-2021), estimated from predicted minus observed rates of hospital contacts per 1,000 child-years for children aged 0 to 4 years, by deprivation quintile and presence of a chronic condition.**

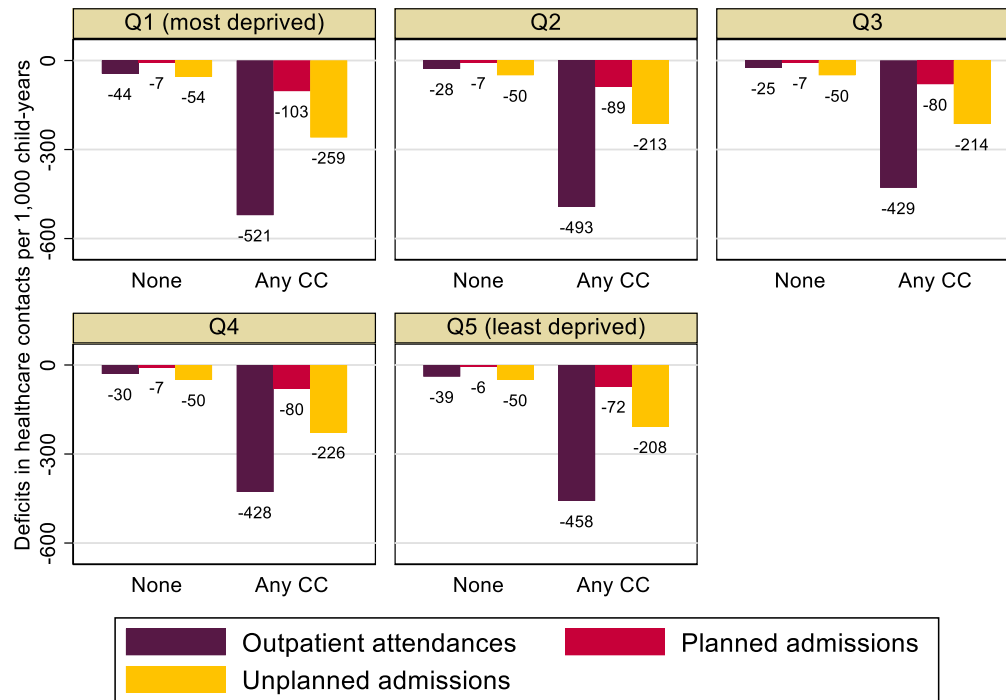

CC – Chronic conditions

**Supplementary Figure 7: Weekly difference in observed and predicted hospital contacts among children aged 0 to 4 years during the pandemic (March 2020-2021), by presence of a chronic condition.**

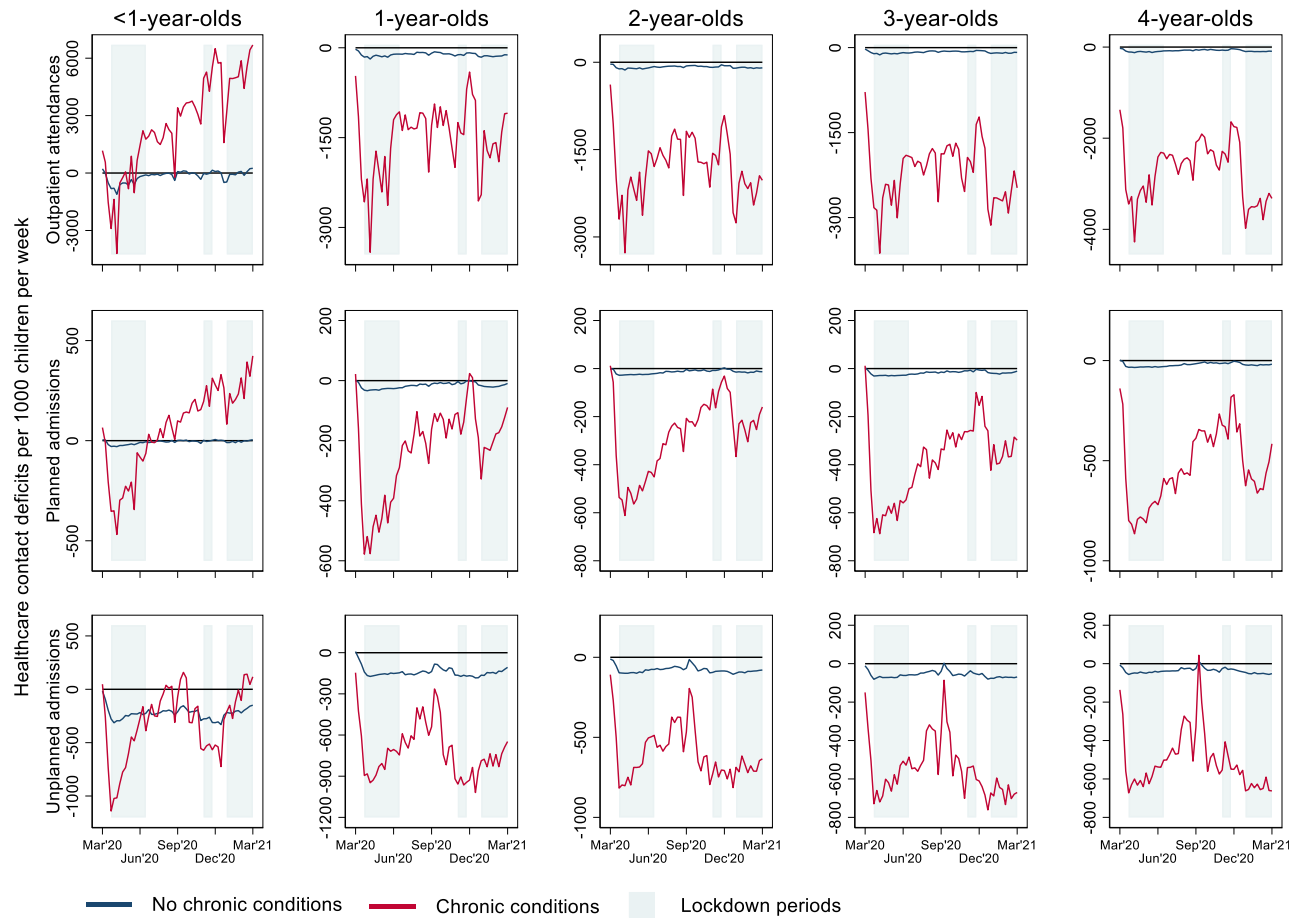

**Supplementary Figure 8: Weekly rates of hospital contacts among children aged 0 to 4 years during the pandemic (March 2020-2021) and on average from 2015-2019, by age comparing children in the most and least deprived IMD quintiles.**

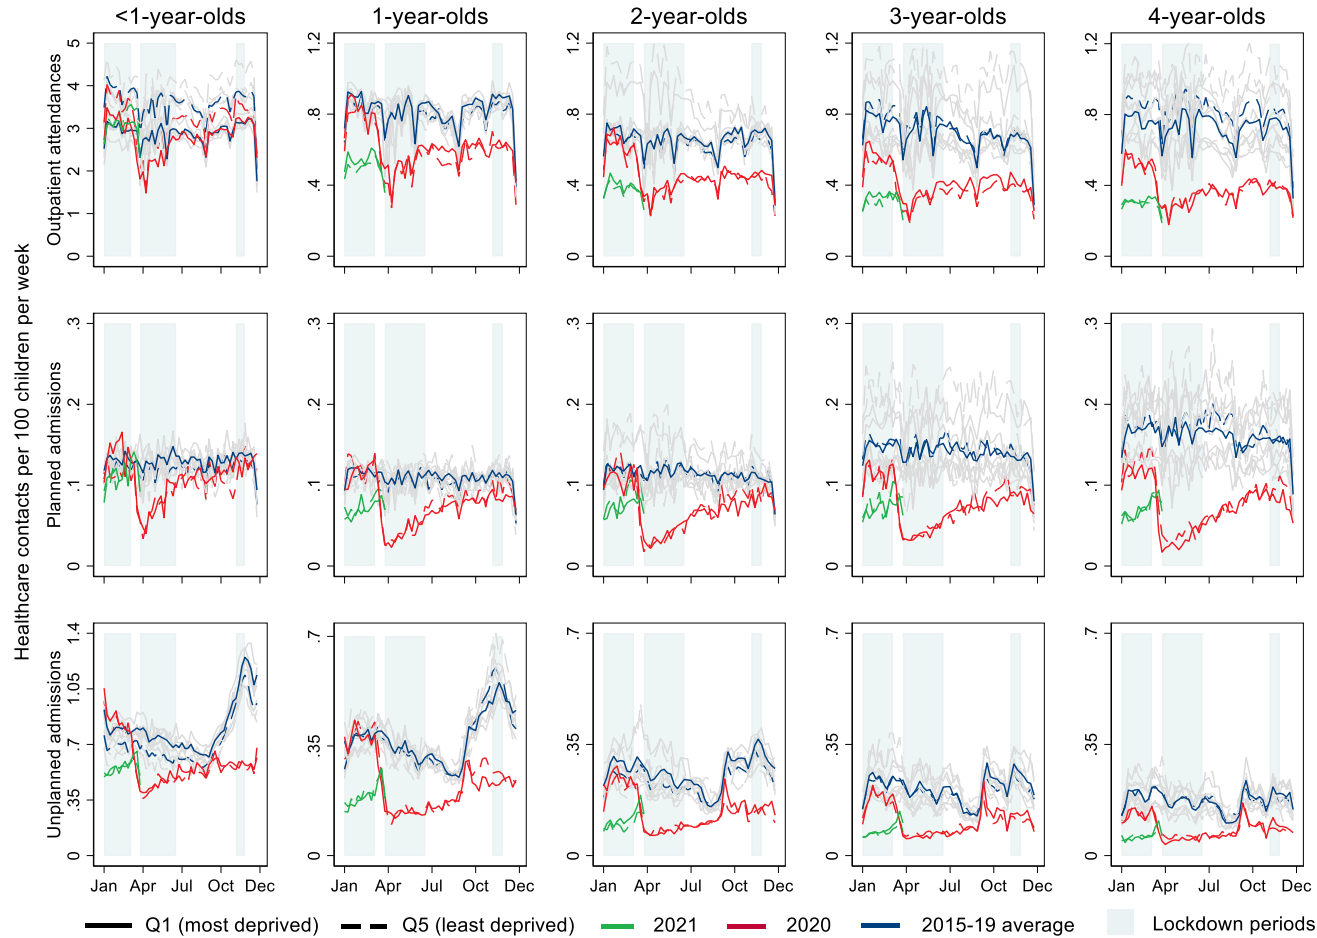

Note: January-March lockdown only affects 2021 data.



**Supplementary Figure 9: Weekly difference in observed and predicted hospital contacts among children aged 0 to 4 years during the pandemic (March 2020-2021), by deprivation quintile.**

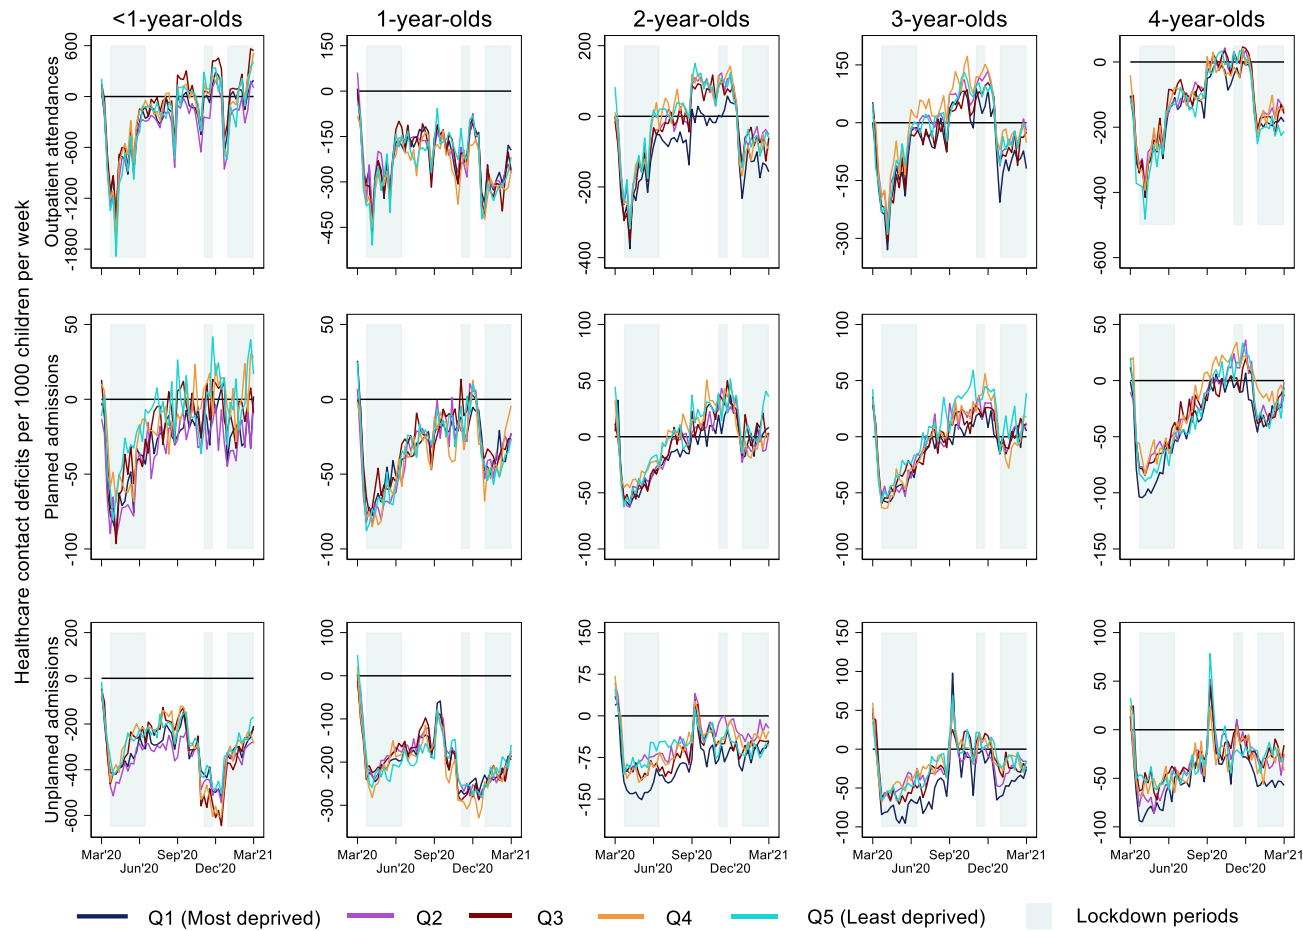

**Supplementary Figure 10: Weekly rates of hospital contacts among children aged 0 to 4 years during the pandemic (March 2020-2021) and on average from 2015-2019, by age comparing children of White and Asian ethnic groups.**

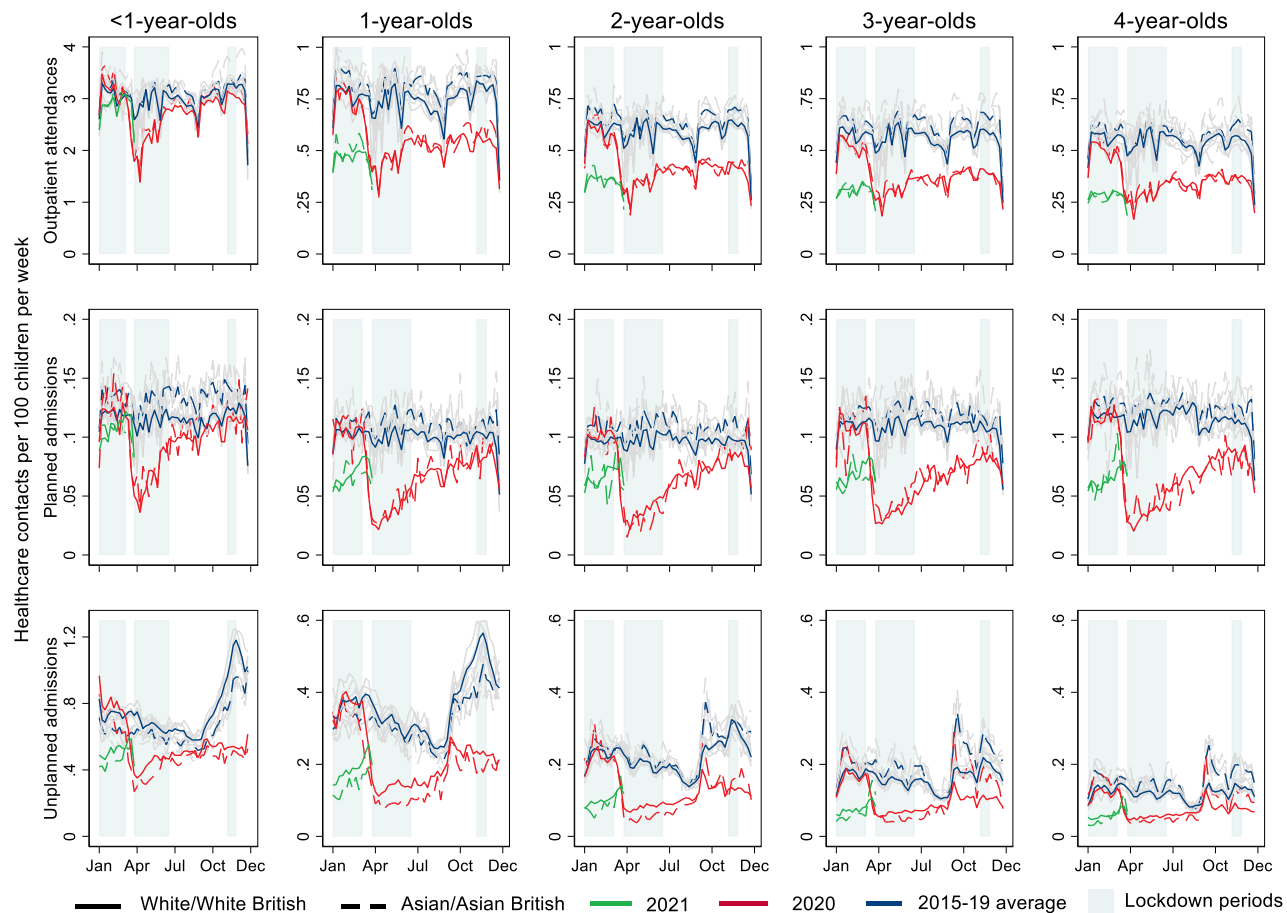

Note: January-March lockdown only affects 2021 data.

**Supplementary Figure 11: Weekly rates of hospital contacts among children aged 0 to 4 years during the pandemic (March 2020-2021) and on average from 2015-2019, by age comparing children of White and Black ethnic groups.**

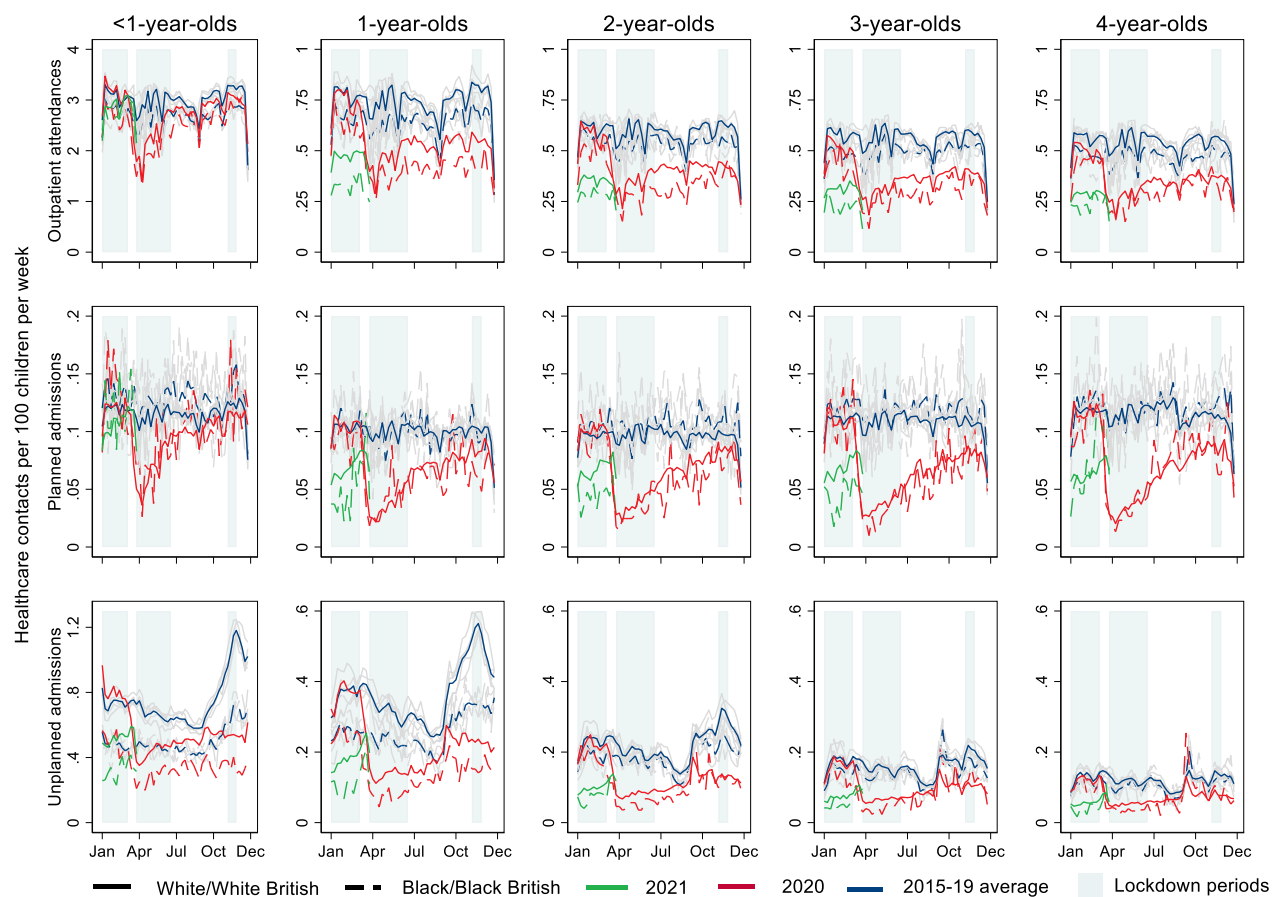

Note: January-March lockdown only affects 2021 data.

**Supplementary Figure 12: Weekly difference in observed and predicted hospital contacts among children aged 0 to 4 years during the pandemic (March 2020-2021), by ethnic group.**

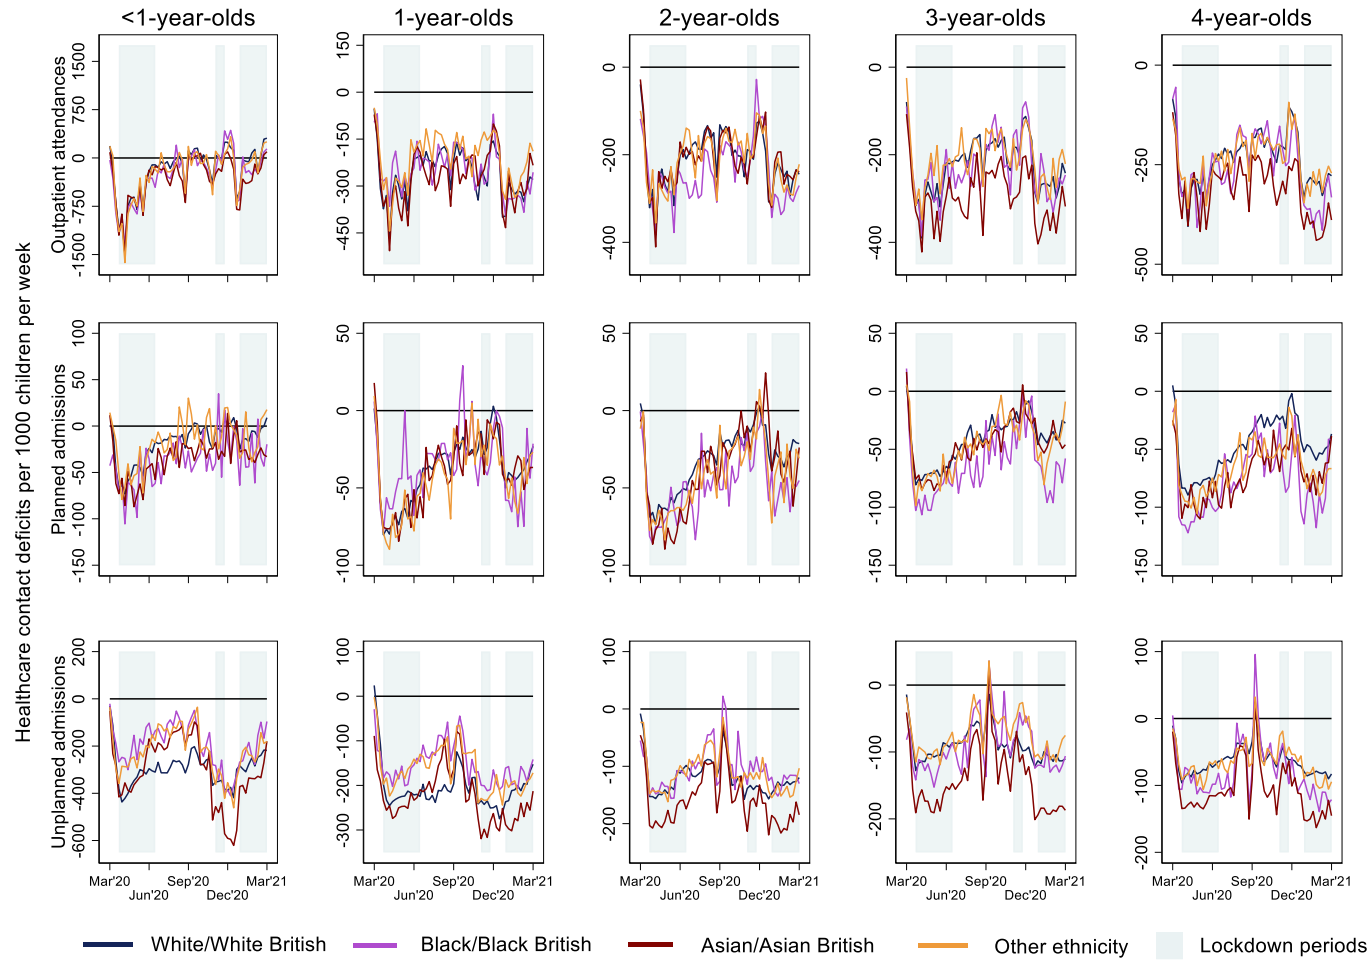

**Supplementary Figure 13: Weekly rates of in-person outpatient appointments among children aged 0 to 4 years during the pandemic (March 2020-2021) and on average from 2015-2019, by age.**

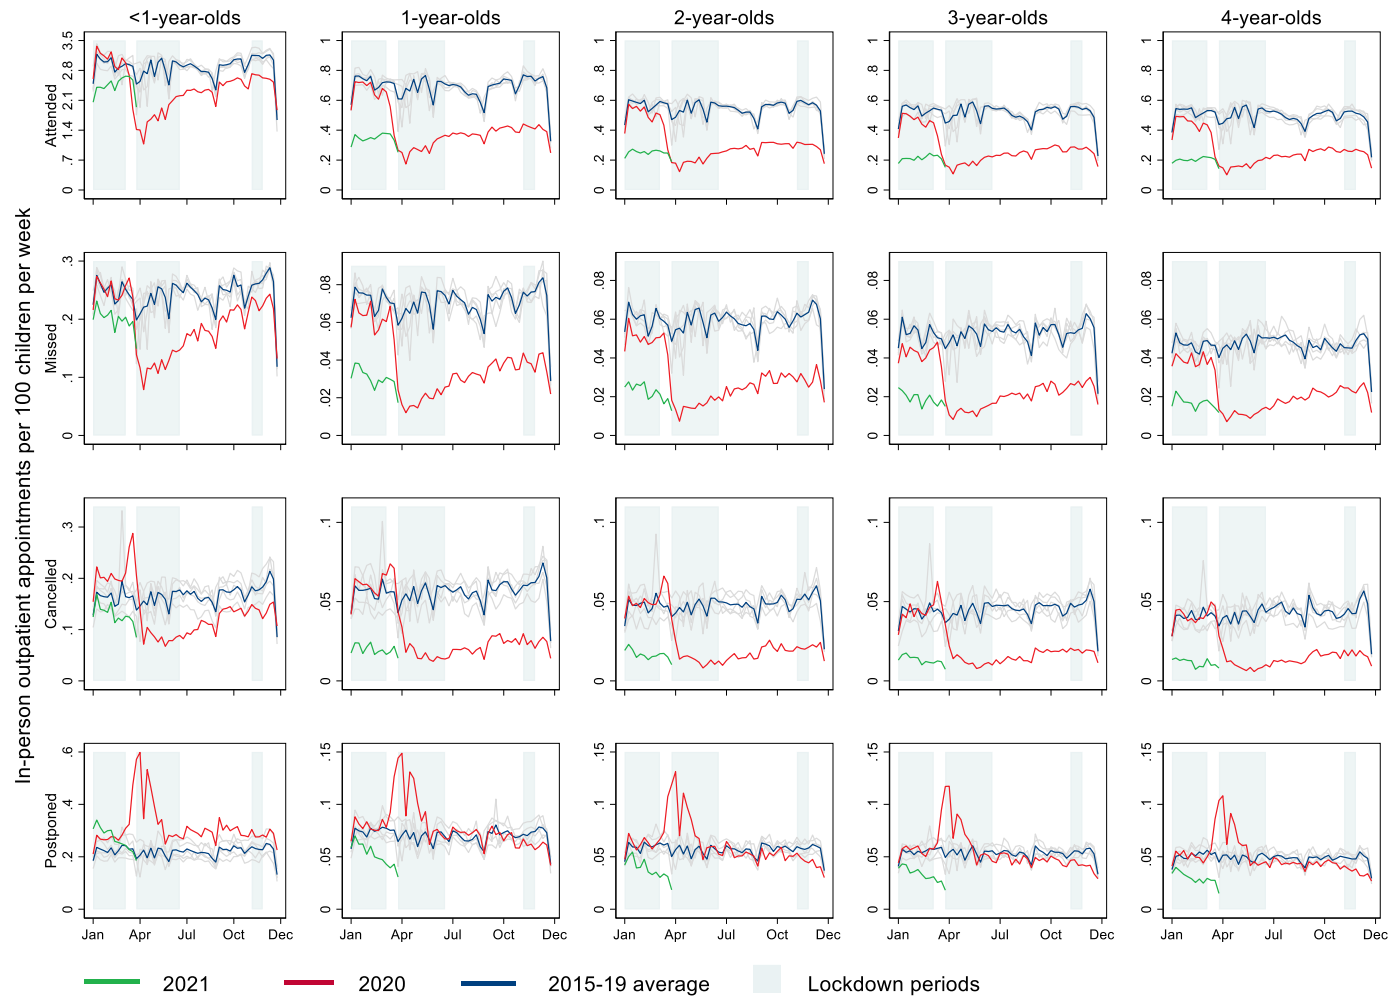

Note: January-March lockdown only affects 2021 data.

**Supplementary Figure 14: Weekly rates of outpatient attendances (In-person vs tele/virtual) among children aged 0 to 4 years during the pandemic (March 2020-2021) and on average from 2015-2019, by age.**

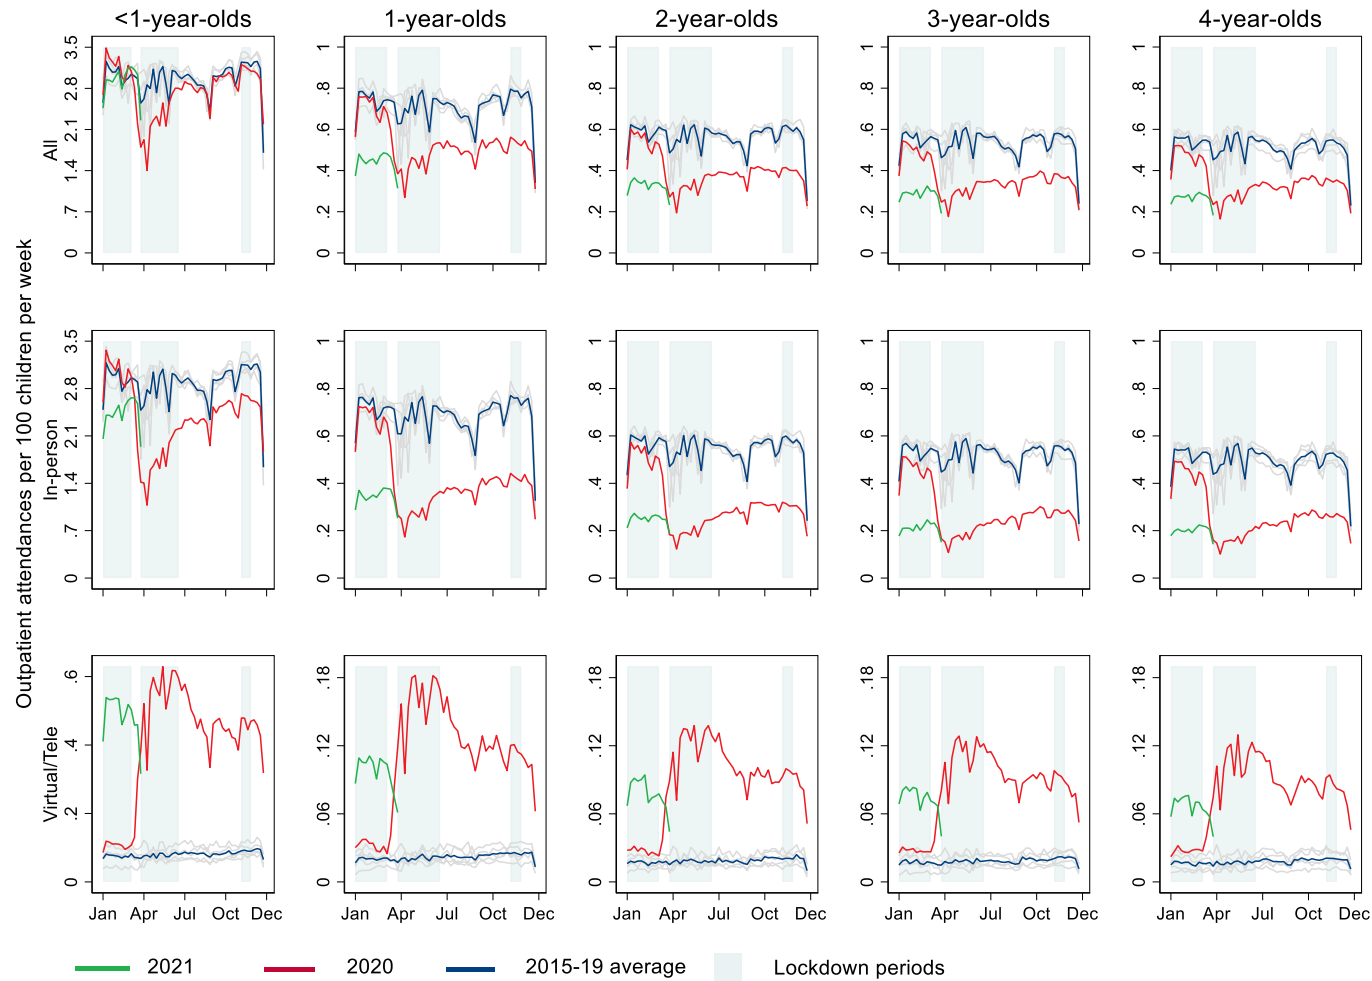

Note: January-March lockdown only affects 2021 data.
